# Supplementary material for: Characterising evapotranspiration signatures for improved behavioural insights
Source: Copernicus journal article supplement (doi:10.5194/hess-2024-373), 2025-01-17
Supplement: Supplementary file 1 [file hess-2024-373-supplement.pdf]

# Supplementary Material to paper ‘Characterising evapotranspiration signatures for improved behavioural insights’

Hansini Gardiya Weligamage<sup>1</sup>, Keirnan Fowler<sup>1</sup>, Margarita Saft<sup>2</sup>, Tim Peterson<sup>3</sup>, Dongryeol Ryu<sup>1</sup>, and Murray C Peel<sup>1</sup>

<sup>1</sup>Department of Infrastructure Engineering, The University of Melbourne, Parkville, Victoria, 3052, Australia

<sup>2</sup>Institute of Applied Geosciences, Technische Universität Berlin, 10587 Berlin, Deutschland, Germany

<sup>3</sup>Department of Civil Engineering, Monash University, Clayton, Victoria, 3168, Australia

Correspondence to: Hansini Gardiya Weligamage (h.gardiyaweligamage@unimelb.edu.au)

This supporting information contains:

- Figure S1: Conventional efficiency metrics values at flux towers using remotely sensed AET ( $AET_{RS}$ ) and flux tower AET ( $AET_{Fluxtower}$ ).

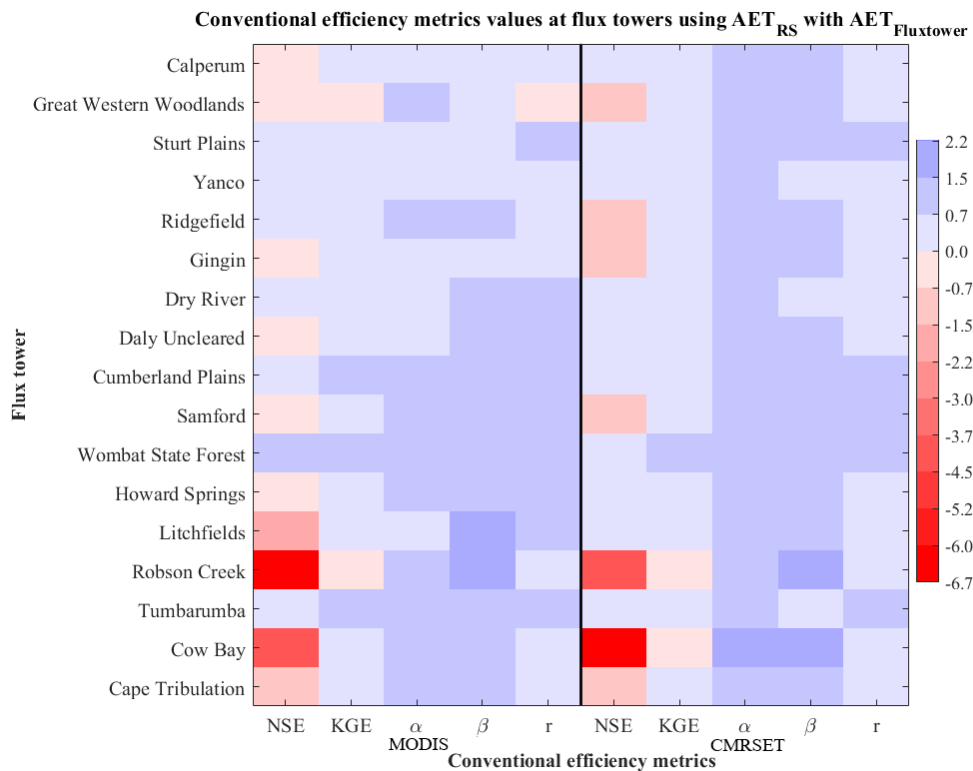

Figure S1: Conventional efficiency metrics values at flux towers using  $AET_{RS}$  with  $AET_{Fluxtower}$ .
